# Supplementary material for: The research on the identification, taxonomy, and comparative genomics analysis of nine Bacillus velezensis strains significantly contributes to microbiology, genetics, bioinformatics, and biotechnology
Source: Front Microbiol. 2025 Mar 19;16:1544934. doi: 10.3389/fmicb.2025.1544934 (PMC11962042; doi:10.3389/fmicb.2025.1544934)
Supplement: Supplementary file 8 [file Table_2.XLSX]

## Sheet: Sheet1
Genbank Access	Organism	Geographic location of isolation
GCF_009183655.1	Bacillus aerolatus	China
GCF_001884185.1	Bacillus albus	China
GCF_002019795.1	Bacillus alkalicellulosilyticus	China
GCF_002797415.1	Bacillus alkalisoli	China
GCF_000691145.1	Bacillus altitudinis	India
GCF_000196735.1	Bacillus amyloliquefaciens	Germany
GCF_001244735.1	Bacillus andreraoultii	France
GCF_000742895.1	Bacillus anthracis	Unknown
GCF_019915265.1	Bacillus aquiflavi	China
GCF_001584335.1	Bacillus atrophaeus	United States
GCF_001307105.1	Bacillus australimaris	China
GCF_001591605.1	Bacillus badius	Japan
GCF_014207535.1	Bacillus benzoevorans	United States
GCF_000299035.1	Bacillus bingmayongensis	China
GCF_004124315.2	Bacillus cabrialesii	Mexico
GCF_000007825.1	Bacillus cereus	France
GCF_000746925.1	Bacillus clarus	Papua-Nova Guiné
GCF_000171615.1	Bacillus coahuilensis	Mexico
GCF_000017425.1	Bacillus cytotoxicus	United States
GCF_900156875.1	Bacillus dakarensis	France
GCF_016908875.1	Bacillus ectoiniformans	United States
GCF_001456935.1	Bacillus enclensis	India
GCF_012955605.1	Bacillus fonticola	China
GCF_002746455.1	Bacillus fungorum	China
GCF_001590835.1	Bacillus gaemokensis	South Korea
GCF_001042475.2	Bacillus glycinifermentans	South Korea
GCF_001278705.1	Bacillus gobiensis	China
GCF_001517105.1	Bacillus halotolerans	Morocco
GCF_001969855.1	Bacillus haynesii	Israel
GCF_018332515.1	Bacillus hominis	Japan
GCF_000332645.1	Bacillus inaquosorum	South Korea
GCF_022809095.1	Bacillus kexueae	China
GCF_001375515.1	Bacillus kwashiorkori	France
GCF_000011645.1	Bacillus licheniformis	Denmark
GCF_001884105.1	Bacillus luti	China
GCF_000712595.1	Bacillus manliponensis	China
GCF_902168435.1	Bacillus marasmi	France
GCF_001644195.2	Bacillus marinisedimentorum	China
GCF_900098925.1	Bacillus massiliglaciei	France
GCF_000380245.2	Bacillus massiliogorillae	Unknown
GCF_900117315.1	Bacillus massilionigeriensis	France
GCF_900111815.1	Bacillus mediterraneensis	France
GCF_011008845.1	Bacillus mesophilus	China
GCF_000262755.1	Bacillus methanolicus	Unknown
GCF_001884045.1	Bacillus mobilis	China
GCF_000245335.1	Bacillus mojavensis	United States
GCF_000832605.1	Bacillus mycoides	United States
GCF_001584325.1	Bacillus nakamurai	Argentina
GCF_000612805.1	Bacillus ndiopicus	Unknown
GCF_001375535.1	Bacillus niameyensis	France
GCF_001884135.1	Bacillus nitratireducens	China
GCF_014836955.1	Bacillus norwichensis	United Kingdom
GCF_900207585.1	Bacillus oleivorans	United States
GCF_016908495.1	Bacillus pakistanensis	United States
GCF_001042485.2	Bacillus paralicheniformis	South Korea
GCF_001884235.1	Bacillus paramycoides	China
GCF_001883995.1	Bacillus paranthracis	China
GCF_001884065.1	Bacillus proteolyticus	China
GCF_000161455.1	Bacillus pseudomycoides	United States
GCF_900186955.1	Bacillus pumilus	Unknown
GCF_016464375.1	Bacillus renqingensis	China
GCF_917563915.1	Bacillus rhizoplanae	France
GCF_000691165.1	Bacillus safensis	United States
GCF_003581585.1	Bacillus salacetis	Thailand
GCF_004358205.1	Bacillus salipaludis	China
GCF_018332475.1	Bacillus sanguinis	Japan
GCF_020519665.1	Bacillus shivajii	China
GCF_000262045.1	Bacillus siamensis	South Korea
GCF_900156865.1	Bacillus sinesaloumensis	France
GCF_001050115.1	Bacillus smithii	United States
GCF_001742425.1	Bacillus solimangrovi	South Korea
GCF_002797395.1	Bacillus solitudinis	China
GCF_001592005.1	Bacillus sonorensis	Japan
GCF_017939705.1	Bacillus suaedae	China
GCF_016890225.1	Bacillus suaedaesalsae	China
GCF_000227465.1	Bacillus spizizenii	United States
GCF_000009045.1	Bacillus subtilis	Unknown
GCF_001969815.1	Bacillus swezeyi	Israel
GCF_003318295.1	Bacillus taeanensis	China
GCF_000507145.1	Bacillus tequilensis	South Korea
GCF_001243895.1	Bacillus testis	France
GCF_002119445.1	Bacillus thuringiensis	South Korea
GCF_016908565.1	Bacillus tianshenii	United States
GCF_000285535.1	Bacillus timonensis	France
GCF_000496285.1	Bacillus toyonensis	Japan
GCF_001884035.1	Bacillus tropicus	China
GCF_004116955.1	Bacillus vallismortis	United States
GCF_001461825.1	Bacillus velezensis	Spain
GCF_001889165.1	Bacillus weihaiensis	China
GCF_001583695.1	Bacillus wiedmannii	United States
GCF_001685015.1	Bacillus wudalianchiensis	China
GCF_000300535.1	Bacillus xiamenensis	China
GCF_002797355.1	Bacillus xiapuensis	China
GCF_000715205.1	Bacillus zhangzhouensis	China
GCF_001461825.1	Bacillus velezensis	Spain
GCF_000015785.2	Bacillus amyloliquefaciens subsp. plantarum	Germany
GCF_001045685.1	Pseudomonas aeruginosa
